# Supplementary material
Source: publisher figshare collection journal article supplement (https://acs.figshare.com/ndownloader/files/4668604)
Supplement: Supplementary file 1 [file 4668604]

## Supplementary Table

*Title:* Structural Models for the KCNQ1 Voltage-gated Potassium Channel

*Authors:* Jarrod Smith, Carlos G. Vanoye, Alfred L. George Jr., Jens Meiler, and Charles R. Sanders, Vanderbilt University

**Supplementary Table 1.** Description of disease-associated mutations within the open and closed state models of KCNQ1.

| Amino Acid Mutation | Phenotype | Site Location: Open State                                                                                                              | Site Location: Closed State     | Surface-Exposed Site? (Open/Closed) | VDW Contacts in Open State (amino acid, subunit letter, residue number)                                                        | VDW Contacts in Closed State                                                            | Known Properties of this Mutant<br><b>Probable Overall Defect</b>                                                                                                                                                                                           | Reference |
|---------------------|-----------|----------------------------------------------------------------------------------------------------------------------------------------|---------------------------------|-------------------------------------|--------------------------------------------------------------------------------------------------------------------------------|-----------------------------------------------------------------------------------------|-------------------------------------------------------------------------------------------------------------------------------------------------------------------------------------------------------------------------------------------------------------|-----------|
| Cys122Tyr           | LQTS1     | S1, N-terminus                                                                                                                         | S1, N-terminus                  | yes/yes                             | TYR A 125<br>HIS A 126                                                                                                         | VAL A 124<br>TYR A 125<br>HIS A 126                                                     |                                                                                                                                                                                                                                                             | (1)       |
| Val133Ile           | LQTS1     | S1, interface between middle of S1 and end of S4 near S4-S5 linker                                                                     | S1, interface between S2 and S4 | partial/partial                     | VAL A 129<br>ILE A 132<br>LEU A 137<br>PHE A 167<br>ARG A 237<br>HIS A 240<br>VAL A 241                                        | VAL A 129<br>ILE A 132<br>LEU A 137<br>LEU A 163<br>ILE A 235<br>MET A 238              |                                                                                                                                                                                                                                                             | (1;2)     |
| Cys136Phe           | LQTS1     | S1, oriented towards center of 4 helix bundle of voltage sensor domain                                                                 | S1, interface between S2 and S4 | no/slightly                         | ILE A 132<br>LEU A 137<br>MET A 159<br>GLU A 160<br>LEU A 163<br>ARG A 237                                                     | ILE A 132<br>SER A 140<br>MET A 159<br>LEU A 163<br>ARG A 231<br>ILE A 235              |                                                                                                                                                                                                                                                             | (1)       |
| Leu137Phe           | LQTS1     | S1, interacts with both lower region of S4 near S4-S5 linker from same subunit and is part of interface with S5 from different subunit | S1, interface between S2 and S4 | partial/yes                         | VAL A 133<br>LEU A 134<br>CYS A 136<br>ILE A 138<br>SER A 140<br>ARG A 237<br>MET A 238<br>VAL A 241<br>ILE B 274<br>TYR B 278 | VAL A 133<br>LEU A 134<br>ILE A 138<br>SER A 140<br>VAL A 141<br>PHE A 232<br>ILE A 235 |                                                                                                                                                                                                                                                             | (3)       |
| Ser140Gly           | AF        | S1, interacts both with middle of S4 from same subunit and S5 from another subunit                                                     | S1, interface with S4           | no/no                               | LEU A 137<br>SER A 143<br>THR A 144<br>GLN A 234<br>ARG A 237<br>TYR B 278                                                     | CYS A 136<br>LEU A 137<br>VAL A 141<br>MET A 159<br>ARG A 231<br>PHE A 232              | When expressed alone, loss of function. In presence of E1, shows dramatically enhanced current and rapid activation at all voltages. When expressed with WT and E1, channel properties that are intermediate between mutant/E1 and WT/E1 are observed. When | (4)       |

|           |       |                                                                                                           |                                                                                |                 |                                                                                                      |                                                                                         |                                                                                                                                                                                                                                                                                                                                                                                                                         |           |
|-----------|-------|-----------------------------------------------------------------------------------------------------------|--------------------------------------------------------------------------------|-----------------|------------------------------------------------------------------------------------------------------|-----------------------------------------------------------------------------------------|-------------------------------------------------------------------------------------------------------------------------------------------------------------------------------------------------------------------------------------------------------------------------------------------------------------------------------------------------------------------------------------------------------------------------|-----------|
|           |       |                                                                                                           |                                                                                |                 |                                                                                                      | ILE A 235                                                                               | expressed with E2, rapid channel activation is retained and current is dramatically increased. (4)<br>When expressed alone, similar to wild type in absence of KCNE1 (George, A.F., et al., unpublished)<br><b>Favors open state in strictly KCNE1-dependent manner.</b>                                                                                                                                                |           |
| Val141Met | AF    | S1, interacts with upper part of S5 and beginning of the pore helix, both from adjacent subunit           | S1, oriented towards solvent                                                   | mostly/yes      | ILE A 138<br>LEU A 142<br>TYR B 278<br>TYR B 299                                                     | LEU A 137<br>SER A 140<br>LEU A 142<br>PHE A 232                                        | When expressed alone (no E1 or WT), very similar to WT but significantly higher current. When expressed with E1, loses much of its voltage dependence of activation—open at all potentials. Retains K <sup>+</sup> selectivity. When co-expressed with E1 and WT, exhibits properties that at intermediate between V141M/E1-only and WT/E1-only. (5)<br><b>Favors open state in a partially KCNE1-dependent manner.</b> | (5;6)     |
| Thr144Ala | LQTS1 | S1, located at C-terminal end of S1, disposed towards the tops of the P-helix and S5 from another subunit | S1, partial interface with S4                                                  | slightly/yes    | SER A 140<br>SER A 143<br>GLN A 234<br>TYR B 278<br>TYR B 281<br>LEU B 282<br>LYS B 285<br>TYR B 299 | ILE A 145<br>ARG A 228<br>PHE A 232                                                     |                                                                                                                                                                                                                                                                                                                                                                                                                         | (7)       |
| Glu146Lys | LQTS1 | S1-S2 oriented so as to fill up much of the space under the S1-S2 loop                                    | at beginning of very short linking helix between S1 and S2, exposed to solvent | partial/yes     | ALA A 149<br>LEU A 151<br>LYS B 285                                                                  | ILE A 145<br>GLN A 147<br>ALA A 149<br>ALA A 150                                        |                                                                                                                                                                                                                                                                                                                                                                                                                         | (3)       |
| Phe157Cys | LQTS1 | S2, located near beginning of S2 helix, oriented so that it interacts on one face with the S1-S2 loop     | at beginning of S2, interacts with S3-S4 loop                                  | yes/yes         | GLY A 154<br>LEU A 156<br>ILE A 161                                                                  | GLY A 154<br>LEU A 156<br>GLU A 160<br>ILE A 161<br>ILE A 227                           |                                                                                                                                                                                                                                                                                                                                                                                                                         | (8)       |
| Glu160Lys | LQTS1 | S2, located in middle of S1-S4 helical bundle                                                             | S2, located in middle of S1-S4 helical bundle                                  | partial/partial | CYS A 136<br>MET A 159<br>ILE A 161<br>VAL A 164<br>VAL A 212<br>LEU A 233<br>ARG A 237              | LEU A 156<br>PHE A 157<br>MET A 159<br>ILE A 161<br>VAL A 164<br>ILE A 227<br>ARG A 231 |                                                                                                                                                                                                                                                                                                                                                                                                                         | (1;9)     |
| Gly168Arg | LQTS1 | S2, near to crossing point with S3 and partially oriented towards S3                                      | oriented away from helical bundle towards solvent                              | yes/yes         | TYR A 171<br>VAL A 172                                                                               | PHE A 167<br>TYR A 171<br>VAL A 172                                                     |                                                                                                                                                                                                                                                                                                                                                                                                                         | (1;10;11) |
| Val172Met | LQTS1 | S2, oriented towards solvent                                                                              | near end of S2, oriented towards solvent                                       | yes/yes         | GLY A 168<br>TYR A 171<br>VAL A 173                                                                  | GLY A 168<br>TYR A 171<br>VAL A 173                                                     |                                                                                                                                                                                                                                                                                                                                                                                                                         | (7)       |

|           |              |                                                                                  |                                                                  |             |                                                               |                                                  |                                                                                                                                                                                                                |
|-----------|--------------|----------------------------------------------------------------------------------|------------------------------------------------------------------|-------------|---------------------------------------------------------------|--------------------------------------------------|----------------------------------------------------------------------------------------------------------------------------------------------------------------------------------------------------------------|
|           |              |                                                                                  |                                                                  |             | TRP A 176                                                     | TRP A 176                                        |                                                                                                                                                                                                                |
| Val173Asp | LQTS1        | S2, located near bottom (C-terminus) of S2, oriented towards solvent             | located near bottom (C-terminus) of S2, oriented towards solvent | yes/yes     | THR A 169<br>VAL A 172<br>ARG A 174<br>SER A 177              | THR A 169<br>VAL A 172<br>ARG A 174<br>SER A 177 | (3)                                                                                                                                                                                                            |
| Arg174Cys | LQTS1        | S2, located near bottom, oriented towards center of sensor domain                | oriented towards beginning of S1, but no contact                 | partial/yes | TYR A 125<br>GLU A 170<br>VAL A 173<br>SER A 177<br>ARG A 243 | GLU A 170<br>VAL A 173<br>LEU A 175              | When expressed alone or with E1: complete loss of function. When co-expressed with E1 and WT, observed channel properties match that of WT. (12) Misfolds/mistrafficks prior to co-assembly with WT. (1;11;12) |
| Arg174His | LQTS1        | S2, located near bottom, oriented towards center of sensor domain                | oriented towards beginning of S1, but no contact                 | partial/yes | TYR A 125<br>GLU A 170<br>VAL A 173<br>SER A 177<br>ARG A 243 | GLU A 170<br>VAL A 173<br>LEU A 175              | (9)                                                                                                                                                                                                            |
| Arg174Pro | LQTS1        | S2, located near bottom, oriented towards center of sensor domain                | oriented towards beginning of S1, but no contact                 | partial/yes | TYR A 125<br>GLU A 170<br>VAL A 173<br>SER A 177<br>ARG A 243 | GLU A 170<br>VAL A 173<br>LEU A 175              | (3)                                                                                                                                                                                                            |
| Ala178Thr | LQTS1        | S2-S3, located at beginning of S2-S3 connector helix                             | located at beginning of S2-S3 connector                          | yes/yes     | SER A 177<br>ARG A 181<br>SER A 182                           | ARG A 181                                        | (13)                                                                                                                                                                                                           |
| Ala178Pro | LQTS1        | S2-S3, located at beginning of S2-S3 connector helix                             | located at beginning of S2-S3 connector                          | yes/yes     | SER A 177<br>ARG A 181<br>SER A 182                           | ARG A 181                                        | (14)                                                                                                                                                                                                           |
| Gly179Ser | LQTS1        | S2-S3, located at beginning of S2-S3 connector helix, oriented towards end of S2 | located at beginning of S2-S3 connector                          | yes/yes     | LEU A 175<br>SER A 182                                        | SER A 182<br>TRP A 188                           | (9)                                                                                                                                                                                                            |
| Tyr184Ser | LQTS1        | S2-S3, in S2-S3 helix oriented away from sensor domain                           | in extended loop in S2-S3 connector, solvent exposed             | yes/yes     | CYS A 180<br>LYS A 183<br>VAL A 185<br>LEU A 187<br>TRP A 188 | GLY A 186<br>PHE A 193<br>LYS A 196              | (15)                                                                                                                                                                                                           |
| Gly189Arg | LQTS1        | S2-S3, near end of S2-S3 helix, oriented towards end of S3                       | in extended loop in S2-S3 connector, solvent exposed             | yes/yes     | GLY A 186<br>ARG A 192<br>PHE A 193<br>LYS A 196              | TRP A 188<br>ARG A 190<br>LEU A 191              | Loss of function, but no DN effect on WT in presence or absence of E1. (16) Misfolds/mistrafficks. (14;16)                                                                                                     |
| Arg190Gln | LQTS1<br>RWS | S2-S3, near end S2-S3 helix, side chain fills nook bounded by loop and end of S3 | in extended loop in S2-S3 connector, solvent exposed             | yes/yes     | LEU A 187<br>LEU A 191<br>LYS A 196<br>SER A 199              | GLY A 189                                        | When expressed alone, sharply reduced current relative to WT., No DN effect on WT in presence or absence of E1. (16) Complete loss of function when expressed in presence or absence of E1. When co-           |

|           |              |                                                                                  |                                                                                                    |                  |                                                                                         |                                                                                         |                                                                                                                                                                                                                                                                                               |      |
|-----------|--------------|----------------------------------------------------------------------------------|----------------------------------------------------------------------------------------------------|------------------|-----------------------------------------------------------------------------------------|-----------------------------------------------------------------------------------------|-----------------------------------------------------------------------------------------------------------------------------------------------------------------------------------------------------------------------------------------------------------------------------------------------|------|
|           |              |                                                                                  |                                                                                                    |                  |                                                                                         |                                                                                         | expressed in presence of WT, no perturbation of WT channel properties. (17)<br><b>Misfolds/mistrafficks.</b>                                                                                                                                                                                  |      |
| Arg190Trp | LQTS1        | S2-S3, near end S2-S3 helix, side chain files nook bounded by loop and end of S3 | in extended loop in S2-S3 connector, solvent exposed                                               | yes/yes          | LEU A 187<br>LEU A 191<br>LYS A 196<br>SER A 199                                        | GLY A 189                                                                               |                                                                                                                                                                                                                                                                                               | (3)  |
| Leu191Pro | LQTS1        | S2-S3, located at end of S2-S3 helix, oriented away from sensor domain           | in extended loop in S2-S3 connector, solvent exposed                                               | yes/yes          | LEU A 187<br>TRP A 188<br>ARG A 190<br>ARG A 192                                        | CYS A 180<br>TRP A 188<br>GLY A 189<br>PHE A 193                                        |                                                                                                                                                                                                                                                                                               | (18) |
| Arg192Pro | LQTS1        | S2-S3, located at end of S2-S3 helix, oriented away from sensor domain           | in extended loop in S2-S3 connector, solvent exposed, could possibly interact with S4-S5 connector | yes/yes          | LEU A 187<br>TRP A 188<br>ARG A 190<br>ARG A 192                                        | CYS A 180<br>TRP A 188<br>GLY A 189<br>PHE A 193                                        |                                                                                                                                                                                                                                                                                               | (3)  |
| Phe193Leu | LQTS1 (mild) | S2-S3, located in loop connecting S2-S3 to S3, oriented towards solvent          | in extended loop in S2-S3 connector, nested interactions with other loop residues                  | yes/partial      | GLY A 189<br>ARG A 192<br>ARG A 195                                                     | TYR A 184<br>GLY A 186<br>TRP A 188<br>LEU A 191<br>ARG A 195<br>LYS A 196              | When expressed alone or with E1 only it is similar to WT, except that current is reduced, activation kinetics are somewhat slowed and $V_{1/2}$ is shifted to a more positive potential. (Not co-expressed with WT) (19)<br><b>Favors closed state in a largely KCNE1-independent manner.</b> | (19) |
| Ala194Pro | LQTS1        | S2-S3, in loop before S3, oriented towards S4-S5 linker                          | in extended loop in S2-S3 connector, nested interactions with other loop residues                  | yes/partial      | ARG A 195                                                                               | ARG A 181<br>ARG A 192<br>ARG A 195<br>ILE A 198                                        |                                                                                                                                                                                                                                                                                               | (9)  |
| Asp202Asn | JLNS         | S3, located near beginning of S3, at interface with S2                           | located in S3, modest interaction with S2                                                          | partial/partial  | TYR A 171<br>ILE A 198<br>VAL A 206                                                     | TYR A 171<br>ARG A 195<br>ILE A 201<br>VAL A 206                                        |                                                                                                                                                                                                                                                                                               | (20) |
| Asp202His | LQTS1        | S3, located near beginning of S3, at interface with S2                           | located in S3, modest interaction with S2                                                          | partial/partial  | TYR A 171<br>ILE A 198<br>VAL A 206                                                     | TYR A 171<br>ARG A 195<br>ILE A 201<br>VAL A 206                                        |                                                                                                                                                                                                                                                                                               | (3)  |
| Ile204Phe | LQTS1        | S3, in S3 at interface with C-terminal end of S4                                 | S3, in S3 at interface with S4                                                                     | partial/slightly | ILE A 200<br>LEU A 203<br>VAL A 205<br>LEU A 239<br>HIS A 240<br>ASP A 242<br>TRP A 248 | ILE A 200<br>ILE A 201<br>LEU A 203<br>VAL A 205<br>GLN A 234<br>ARG A 237<br>VAL A 241 |                                                                                                                                                                                                                                                                                               | (1)  |
| Ile204Met | LQTS         | S3, in S3 at interface with C-terminal end of S4                                 | S3, in S3 at interface with S4                                                                     | partial/slightly | ILE A 200<br>LEU A 203<br>VAL A 205<br>LEU A 239                                        | ILE A 200<br>ILE A 201<br>LEU A 203<br>VAL A 205                                        |                                                                                                                                                                                                                                                                                               | (3)  |

|           |       |                                                                      |                                                                                                          |              |                                                                                         |                                                                                                                                             |                                                                                                                                                                                                                                                                                   |           |
|-----------|-------|----------------------------------------------------------------------|----------------------------------------------------------------------------------------------------------|--------------|-----------------------------------------------------------------------------------------|---------------------------------------------------------------------------------------------------------------------------------------------|-----------------------------------------------------------------------------------------------------------------------------------------------------------------------------------------------------------------------------------------------------------------------------------|-----------|
|           |       |                                                                      |                                                                                                          |              | HIS A 240<br>ASP A 242<br>TRP A 248                                                     | GLN A 234<br>ARG A 237<br>VAL A 241                                                                                                         |                                                                                                                                                                                                                                                                                   |           |
| Ser209Phe | LQTS  | near middle of S3, at interface with S2                              | modest interface with S2                                                                                 | partial/yes  | VAL A 164<br>PHE A 167<br>VAL A 205<br>LEU A 213                                        | VAL A 205<br>VAL A 206<br>ALA A 208<br>LEU A 213                                                                                            | (3)                                                                                                                                                                                                                                                                               |           |
| Val215Met | LQTS  | at C-terminus of S3, partly at interface with beginning of S4        | at end of S3, interacts with S3-S4 loop and S4                                                           | yes/partial  | VAL A 212<br>CYS A 214<br>ILE A 230<br>LEU A 233                                        | VAL A 211<br>CYS A 214<br>GLY A 216<br>GLY A 219<br>ALA A 223<br>ALA A 226<br>ILE A 227                                                     | (3)                                                                                                                                                                                                                                                                               |           |
| Ser225Leu | LQTS1 | S4, located near beginning of S4, oriented towards S3-S4 loop        | interacting with end of S1 from same subunit and at interface with S4 from another subunit               | yes/slightly | VAL A 221<br>THR A 224                                                                  | VAL A 221<br>ARG A 228<br>LEU B 282<br>LYS B 285<br>TYR B 299                                                                               | When expressed only with E1, current is reduced and $V_{1/2}$ is shifted towards more positive potential. Trafficks normally. When co-expressed with WT, exerts DN effect to reduce current. (21)<br>Favors closed state, at least in presence of KCNE1.                          | (22) (21) |
| Ala226Val | LQTS1 | S4, located near beginning of S4, oriented towards S3-S4 loop and S3 | near beginning of S4 at interface with S5 from another subunit, some interaction with S3 of same subunit | yes/slightly | VAL A 221<br>ILE A 227<br>ILE A 230                                                     | VAL A 211<br>VAL A 215<br>ALA A 223<br>ILE A 227<br>PHE B 279<br>LEU B 282                                                                  | (23)                                                                                                                                                                                                                                                                              |           |
| Arg231Cys | LQTS1 | S4, located at interface with S5 from another subunit                | located at interface between S1 and S2 of the same subunit                                               | partial/no   | ILE A 227<br>ARG A 228<br>PHE A 232<br>ILE A 235<br>PHE B 279<br>LEU B 282<br>ALA B 283 | CYS A 136<br>SER A 140<br>MET A 159<br>GLU A 160<br>LEU A 163<br>VAL A 164<br>ALA A 208<br>VAL A 212<br>ILE A 227<br>ILE A 230<br>GLN A 234 | (24)                                                                                                                                                                                                                                                                              |           |
| Arg231His | LQTS1 | S4, located at interface with S5 from another subunit                | located at interface between S1 and S2 of the same subunit                                               | partial/no   | ILE A 227<br>ARG A 228<br>PHE A 232<br>ILE A 235<br>PHE B 279<br>LEU B 282<br>ALA B 283 | CYS A 136<br>SER A 140<br>MET A 159<br>GLU A 160<br>LEU A 163<br>VAL A 164<br>ALA A 208<br>VAL A 212<br>ILE A 227<br>ILE A 230<br>GLN A 234 | Non-disease mutants R231A and R237A result in constitutive activation of the channel in both the presence and absence of KCNE1.(25)<br>Mutation of this key residue in the voltage sensor to Ala favor the open state relative to the closed state in a KCNE1-independent manner. | (3) (25)  |

|           |       |                                                                                         |                                                       |                  |                                                                                                      |                                                                                                                   |                                                                                                                                                                                                                                                                                                                                                                                                                                                                                                                                                                                                                                                                                                                                                                                                                                                                                                                                     |                            |
|-----------|-------|-----------------------------------------------------------------------------------------|-------------------------------------------------------|------------------|------------------------------------------------------------------------------------------------------|-------------------------------------------------------------------------------------------------------------------|-------------------------------------------------------------------------------------------------------------------------------------------------------------------------------------------------------------------------------------------------------------------------------------------------------------------------------------------------------------------------------------------------------------------------------------------------------------------------------------------------------------------------------------------------------------------------------------------------------------------------------------------------------------------------------------------------------------------------------------------------------------------------------------------------------------------------------------------------------------------------------------------------------------------------------------|----------------------------|
| Ile235Asn | LQTS1 | S4, , located at interface with S5 from another subunit                                 | at interface with S1 from same subunit                | partial/slightly | ARG A 231<br>PHE A 232<br>GLN A 234<br>LEU A 236<br>PHE B 275<br>TYR B 278<br>PHE B 279<br>LEU B 282 | VAL A 133<br>CYS A 136<br>LEU A 137<br>SER A 140<br>PHE A 232<br>GLN A 234<br>LEU A 236<br>MET A 238<br>PHE B 275 | (1;26)                                                                                                                                                                                                                                                                                                                                                                                                                                                                                                                                                                                                                                                                                                                                                                                                                                                                                                                              |                            |
| Leu239Pro | LQTS1 | located near end of S4 , where it interacts with both S3 and S4-S5 linker               | a little interaction with S5 from a different subunit | partial/partial  | ILE A 204<br>LEU A 236<br>MET A 238<br>HIS A 240<br>ASP A 242<br>TRP A 248<br>LEU B 271              | LEU A 236<br>HIS A 240<br>ASP A 242<br>ARG A 243<br>LEU B 271                                                     | (3)                                                                                                                                                                                                                                                                                                                                                                                                                                                                                                                                                                                                                                                                                                                                                                                                                                                                                                                                 |                            |
| Asp242Asn | LQTS1 | located at end of S4 and interacts with S4-S5                                           | surface exposed                                       | no/yes           | ILE A 200<br>ILE A 201<br>ILE A 204<br>LEU A 239<br>ARG A 243<br>TRP A 248<br>ARG A 249              | MET A 238<br>LEU A 239<br>ARG A 243                                                                               | (1;27)                                                                                                                                                                                                                                                                                                                                                                                                                                                                                                                                                                                                                                                                                                                                                                                                                                                                                                                              |                            |
| Arg243Cys | LQTS1 | located at S4 connector to S4-S5 helix, oriented towards middle of S1-S4 helical bundle | interface with S5 of a different subunit              | partial/partial  | HIS A 126<br>VAL A 129<br>GLU A 170<br>ARG A 174<br>ILE A 201<br>ASP A 242<br>GLN A 244              | LEU A 239<br>HIS A 240<br>ASP A 242<br>THR B 264<br>TYR B 267<br>ILE B 268<br>LEU B 271                           | (1;28)                                                                                                                                                                                                                                                                                                                                                                                                                                                                                                                                                                                                                                                                                                                                                                                                                                                                                                                              |                            |
| Arg243His | JLNS  | located at S4 connector to S4-S5 helix, oriented towards middle of S1-S4 helical bundle | interface with S5 of a different subunit              | partial/partial  | HIS A 126<br>VAL A 129<br>GLU A 170<br>ARG A 174<br>ILE A 201<br>ASP A 242<br>GLN A 244              | LEU A 239<br>HIS A 240<br>ASP A 242<br>THR B 264<br>TYR B 267<br>ILE B 268<br>LEU B 271                           | R243H plus E1 channel exhibits only minimal current. R243H plus E1 plus WT exhibits ca 40% reduced current relative to WT, V <sub>1/2</sub> shifted to more positive potentials, and more rapid deactivation. (29)<br>When expressed alone it is similar to WT. When co-expressed with KCNE1, exhibits much lower current than WT and a V <sub>1/2</sub> shifted to more positive values. When expressed with WT and E1, current is reduced to about 50% of WT/WT, V <sub>1/2</sub> is shifted to higher values, and deactivation I is more rapid. (17)<br>When expressed alone, slightly reduced current, slowed activation and increased V <sub>1/2</sub> . When expressed with WT only, current similar to WT, but slowed activation and increased V <sub>1/2</sub> . (28)<br>Does show some trafficking deficiency. (30)<br>This site is believed to be involved in PIP <sub>2</sub> , which is defective for this mutant. (31) | (17;29;31;32)<br>(28) (30) |

|           |       |                                                                                        |                                                                              |                   |                                                                                                                                |                                                                                                                   |                                                                                                                                                                                                                                                                                                                                                                                                              |          |
|-----------|-------|----------------------------------------------------------------------------------------|------------------------------------------------------------------------------|-------------------|--------------------------------------------------------------------------------------------------------------------------------|-------------------------------------------------------------------------------------------------------------------|--------------------------------------------------------------------------------------------------------------------------------------------------------------------------------------------------------------------------------------------------------------------------------------------------------------------------------------------------------------------------------------------------------------|----------|
| Trp248Arg | LQTS1 | in S4-S5 helix, at interface with S4 from same subunit and S5 from a different subunit | interface with S3 from same subunit, and with S5 and S6 from another subunit | slightly/slightly | ILE A 200<br>ILE A 204<br>LEU A 239<br>ASP A 242<br>ARG A 249<br>LEU A 251<br>TYR B 267<br>LEU B 271                           | PRO A 197<br>ILE A 198<br>GLN A 244<br>GLY A 245<br>THR A 247<br>ARG A 249<br>LEU A 251                           | Defect is KCNE1-dependent. Favors closed state. Modest tendency to misfold/mistraffick. Involved in PIP <sub>2</sub> binding.<br><br>When expressed alone, reduced current, slowed activation and increased V <sub>1/2</sub> . When expressed with WT only, current is somewhat lower than WT, slowed activation and increased V <sub>1/2</sub> . (28)<br>Favors closed state in a KCNE1 independent manner. | (28)     |
| Leu250His | LQTS1 | in S4-S5 at interface with bottom of S6 from same subunit                              | in S4-S5 at interface with bottom of S6 from same subunit                    | slightly/partial  | THR A 247<br>ARG A 249<br>VAL A 254<br>PHE A 351<br>LYS A 354<br>VAL A 355<br>LYS A 358                                        | SER A 253<br>VAL A 254<br>LYS A 354                                                                               |                                                                                                                                                                                                                                                                                                                                                                                                              | (27)     |
| Leu251Pro | LQTS1 | in S4-S5 at interface with S6 from same subunit and S5 and S6 from another subunit     | at interface with S6 from both same and different subunit                    | slightly/no       | THR A 247<br>TRP A 248<br>GLY A 252<br>VAL A 254<br>VAL A 255<br>PHE A 351<br>ILE B 268<br>LEU B 271<br>PHE B 339<br>LEU B 342 | THR A 247<br>TRP A 248<br>GLY A 252<br>VAL A 254<br>VAL A 255<br>ARG A 259<br>LEU A 262<br>ILE A 346<br>LEU A 347 | Complete loss of function with or without KCNE1. DN reduction of WT current with no other affects on channel properties. (33)<br>Misfolds/mistrafficks                                                                                                                                                                                                                                                       | (33;34)  |
| Val254Met | LQTS1 | in S4-S5 interacting with S6 from some subunit and S6 from adjacent subunit            | at interface with S6 from both same and different subunit                    | slightly/slightly | LEU A 250<br>LEU A 251<br>SER A 253<br>VAL A 255<br>HIS A 258<br>LEU A 347<br>GLY A 350<br>PHE A 351<br>LYS A 354<br>LEU B 342 | LEU A 250<br>LEU A 251<br>SER A 253<br>VAL A 255<br>HIS A 258<br>ARG A 259<br>LEU A 353                           |                                                                                                                                                                                                                                                                                                                                                                                                              | (1;14)   |
| Val254Leu | LQTS1 | in S4-S5 interacting with S6 from some subunit and S6 from adjacent subunit            | at interface with S6 from both same and different subunit                    | slightly/slightly | LEU A 250<br>LEU A 251<br>SER A 253<br>VAL A 255<br>HIS A 258<br>LEU A 347<br>GLY A 350<br>PHE A 351<br>LYS A 354<br>LEU B 342 | LEU A 250<br>LEU A 251<br>SER A 253<br>VAL A 255<br>HIS A 258<br>ARG A 259<br>LEU A 353                           | Loss of function when expressed alone. When co-expressed with WT, DN effect on channel current. When co-expressed with WT and E1, DN effect on channel current and increase in the V <sub>1/2</sub> for channel activation. (16)<br>Favors closed state in KCNE1-independent manner.                                                                                                                         | (3) (16) |

|           |       |                                                                                              |                                                                                                                 |                  |                                                                                         |                                                                                                                                                          |                                                                                                                                                                                                                                                                                                                                             |                 |
|-----------|-------|----------------------------------------------------------------------------------------------|-----------------------------------------------------------------------------------------------------------------|------------------|-----------------------------------------------------------------------------------------|----------------------------------------------------------------------------------------------------------------------------------------------------------|---------------------------------------------------------------------------------------------------------------------------------------------------------------------------------------------------------------------------------------------------------------------------------------------------------------------------------------------|-----------------|
| His258Asn | LQTS1 | located at turn connector between S4-S5 helix and S5, at interface with S6 from same subunit | at interface with S6 from both same and different subunit                                                       | partial/partial  | VAL A 254<br>ILE A 257<br>GLU A 261<br>ILE A 346<br>LEU A 347<br>GLY A 350              | VAL A 254<br>ILE A 257<br>ARG A 259<br>LEU A 353<br>VAL D 355<br>LYS D 358                                                                               |                                                                                                                                                                                                                                                                                                                                             | (3)             |
| His258Arg | LQTS1 | located at turn connector between S4-S5 helix and S5, at interface with S6 from same subunit | at interface with S6 from both same and different subunit                                                       | partial/partial  | VAL A 254<br>ILE A 257<br>GLU A 261<br>ILE A 346<br>LEU A 347<br>GLY A 350              | VAL A 254<br>ILE A 257<br>ARG A 259<br>LEU A 353<br>VAL D 355<br>LYS D 358                                                                               |                                                                                                                                                                                                                                                                                                                                             | (3)             |
| Arg259Cys | LQTS1 | in S5 facing outwards into solvent from channel domain                                       | at interface with S6 from both same and different subunit                                                       | yes/no           | PHE A 256<br>LEU A 262<br>ILE A 263                                                     | LEU A 251<br>VAL A 254<br>VAL A 255<br>HIS A 258<br>GLU A 261<br>LEU A 262<br>ILE A 346<br>SER A 349<br>PHE D 351<br>LYS D 354<br>VAL D 355<br>LYS D 358 | When expressed alone it is WT-like except that current is reduced. When expressed alone with E1 or both E1 and WT Q1, current is reduced and voltage-dependence of activation is shifted to more positive potentials. (35)<br>Favors closed state in KCNE1-dependent manner.                                                                | (1;35)          |
| Arg259Leu | LQTS1 | in S5 facing outwards into solvent from channel domain                                       | at interface with S6 from both same and different subunit                                                       | yes/no           | PHE A 256<br>LEU A 262<br>ILE A 263                                                     | LEU A 251<br>VAL A 254<br>VAL A 255<br>HIS A 258<br>GLU A 261<br>LEU A 262<br>ILE A 346<br>SER A 349<br>PHE D 351<br>LYS D 354<br>VAL D 355<br>LYS D 358 |                                                                                                                                                                                                                                                                                                                                             | (26) (1)        |
| Glu261Asp | JLNS  | in S5, interacting with S6 from both same subunit and close to S6 from adjacent subunit      | interacts with S6 from both same and different subunit, also interacts with S4-S5 linker from different subunit | partial/slightly | HIS A 258<br>GLN A 260<br>THR A 264<br>THR A 265<br>PRO A 343<br>ILE A 346<br>LEU A 347 | ARG A 259<br>GLN A 260<br>LEU A 262<br>THR A 265<br>LEU A 342<br>ILE A 346<br>THR D 247<br>PHE D 351<br>LYS D 354                                        | E261E plus E1 channel exhibits minimal current. E261E plus E1 plus WT also exhibits only minimal current—strong DN effect. (29)<br>Severe mistrafficking with or without E1 or WT. Also causes mistrafficking of co-expressed WT. (30)<br>Misfolds/mistrafficks in KCNE1 independent manner. Also causes mistrafficking of co-expressed WT. | (1;30;36) (29)  |
| Glu261Lys | LQTS1 | in S5, interacting with S6 from both same subunit and close to S6 from adjacent              | interacts with S6 from both same and different subunit, also interacts with S4-S5                               | partial/slightly | HIS A 258<br>GLN A 260<br>THR A 264<br>THR A 265                                        | ARG A 259<br>GLN A 260<br>LEU A 262<br>THR A 265                                                                                                         | In absence or presence of E1, complete loss of function. Upon co-expression with WT, channel has WT properties. (28)<br>Severe mistrafficking with or without E1 or                                                                                                                                                                         | (11;28;29) (30) |



|           |       |                                                                                                                    |                                                                                         |                   |                                                                                                                                             |                                                                                                                   |                                                                                                                                                                                                                                                                  |              |
|-----------|-------|--------------------------------------------------------------------------------------------------------------------|-----------------------------------------------------------------------------------------|-------------------|---------------------------------------------------------------------------------------------------------------------------------------------|-------------------------------------------------------------------------------------------------------------------|------------------------------------------------------------------------------------------------------------------------------------------------------------------------------------------------------------------------------------------------------------------|--------------|
|           |       | subunit                                                                                                            | linker from different subunit                                                           |                   | PRO A 343<br>ILE A 346<br>LEU A 347                                                                                                         | LEU A 342<br>ILE A 346<br>THR D 247<br>PHE D 351<br>LYS D 354                                                     | WT. Also causes mistrafficking of co-expressed WT. (30)<br><b>Mistrafficks/misfolds.</b>                                                                                                                                                                         |              |
| Leu262Val |       | in S5 at interface with S6 from adjacent subunit                                                                   | interacts with S6 from both same subunit, interacts with S4-S5 linker from same subunit | partial/slightly  | VAL A 255<br>ARG A 259<br>ILE A 263<br>THR A 265<br>LEU A 266<br>PHE B 335                                                                  | LEU A 251<br>VAL A 255<br>ARG A 259<br>GLU A 261<br>ILE A 263<br>LEU A 266<br>PHE A 339<br>LEU A 342<br>ILE A 346 | (3)                                                                                                                                                                                                                                                              |              |
| Leu266Pro | LQTS1 | in S5 at interface with S6 from adjacent subunit                                                                   | Interacts with S6 from same subunit                                                     | partial/partial   | LEU A 262<br>THR A 265<br>PHE A 270<br>VAL B 334                                                                                            | LEU A 262<br>ILE A 263<br>TYR A 267<br>PHE A 339                                                                  |                                                                                                                                                                                                                                                                  | (1;9)        |
| Gly269Ser | LQTS1 | S5, located near end of pore helix and S6 of same subunit                                                          | at interface with S6 from same subunit                                                  | no/no             | ILE A 268<br>LEU A 273<br>VAL A 310<br>PHE A 339<br>PHE A 340                                                                               | ILE A 268<br>GLY A 272<br>PHE A 332                                                                               | When expressed with E1 only: complete loss of function. When expressed with WT and E1, the channel exhibits normal WT properties, but current is 50% relative to WT/WT case. This mutant most likely misfolds/mistrafficks.(37)<br><b>Mistrafficks/misfolds.</b> | (1) (37)     |
| Gly269Asp | LQTS1 | S5, located near end of pore helix and S6 of same subunit                                                          | at interface with S6 from same subunit                                                  | no/no             | ILE A 268<br>LEU A 273<br>VAL A 310<br>PHE A 339<br>PHE A 340                                                                               | ILE A 268<br>GLY A 272<br>PHE A 332                                                                               | When expressed alone or with E1: complete loss of function. When co-expressed with E1 and WT, observed channel properties match that of WT. Likely misfolds/mistrafficks prior to co-assembly with WT. (12)<br><b>Mistrafficks/misfolds.</b>                     | (1;11;12)    |
| Gly272Asp | JLNS  | S5, located at interface with S6 from same subunit                                                                 | located at interface with S6 from same subunit                                          | slightly/no       | LEU A 271<br>PHE A 275<br>PHE A 332<br>PHE A 339                                                                                            | GLY A 269<br>PHE A 275<br>PHE A 332<br>PHE A 335                                                                  |                                                                                                                                                                                                                                                                  | (3;38)       |
| Leu273Phe | LQTS1 | S5, located at interface with pore helix from same subunit, with some contact to S6 from both same another subunit | located at interface with S6 from same subunit; close to S4 from another subunit        | slightly/slightly | GLY A 269<br>PHE A 270<br>ILE A 274<br>SER A 276<br>SER A 277<br>LEU A 303<br>GLY A 306<br>VAL A 307<br>VAL A 310<br>PHE A 332<br>SER B 330 | PHE A 270<br>ILE A 274<br>SER A 276<br>SER A 277<br>LEU A 303<br>GLY A 306<br>VAL A 307<br>VAL A 310<br>PHE A 332 | L273F exhibits inactivation even in the presence of KCNE1, which normally suppresses inactivation (39)<br>Exhibits some degree of trafficking deficit. (40)<br><b>Restores inactivation to KCNQ1 in presence of KCNE1. Some tendency to misfold/mistraffick.</b> | (1;14;39;40) |
| Ile274Val | SIDS  | S5, located at interface between S1 and S4 of another                                                              | a little interaction with S6 from same subunit                                          | partial/yes       | PHE A 270<br>LEU A 273<br>TYR A 278                                                                                                         | PHE A 270<br>LEU A 273<br>SER A 277                                                                               | Similar to WT in the absence of E1. In presence of E1 exhibits higher current than WT, faster activation kinetics, and slow                                                                                                                                      | (41)         |

|           |       |                                                                                                                           |                                                                                                  |                   |                                                                                                                                |                                                                                                                   |                                                                                                                                                                                                                       |         |
|-----------|-------|---------------------------------------------------------------------------------------------------------------------------|--------------------------------------------------------------------------------------------------|-------------------|--------------------------------------------------------------------------------------------------------------------------------|-------------------------------------------------------------------------------------------------------------------|-----------------------------------------------------------------------------------------------------------------------------------------------------------------------------------------------------------------------|---------|
|           |       | subunit                                                                                                                   |                                                                                                  |                   | TYR A 299<br>LEU D 137<br>MET D 238                                                                                            | TYR A 278<br>LEU A 303<br>PHE D 232<br>LEU D 236                                                                  | deactivation, although no significant change in $V_{1/2}$ . (TE Rhodes, AF George et al., unpublished)<br>Favors open state in KCNE1-specific manner.                                                                 |         |
| Phe275Ser | LQTS1 | in S5 located in gap between S5 of same subunit and S4 of another, contacting both                                        | interacts with S6 segment of same subunit and with S4 from a different subunit                   | partial/slightly  | LEU A 271<br>GLY A 272<br>SER A 276<br>PHE A 279<br>ILE A 328<br>PHE A 335<br>ILE D 235<br>LEU D 236                           | GLY A 272<br>SER A 276<br>ILE A 328<br>CYS A 331<br>PHE A 332<br>LEU D 233<br>LEU D 236<br>ARG D 237              | (18)                                                                                                                                                                                                                  |         |
| Ser277Leu | LQTS1 | in S5, located at interface with P-helix                                                                                  | in S5, located at interface with P-helix                                                         | no/slightly       | LEU A 273<br>SER A 276<br>TYR A 299<br>ALA A 302<br>LEU A 303<br>GLY A 306                                                     | LEU A 273<br>ILE A 274<br>SER A 276<br>TYR A 278<br>ALA A 302<br>LEU A 303                                        | (1;42)                                                                                                                                                                                                                |         |
| Ser277Trp | LQTS  | in S5, located at interface with P-helix                                                                                  | in S5, located at interface with P-helix                                                         | no/slightly       | LEU A 273<br>SER A 276<br>TYR A 299<br>ALA A 302<br>LEU A 303<br>GLY A 306                                                     | LEU A 273<br>ILE A 274<br>SER A 276<br>TYR A 278<br>ALA A 302<br>LEU A 303                                        | (3)                                                                                                                                                                                                                   |         |
| Tyr278His | LQTS1 | S5, at interface with both S1 and S4 from another subunit in open state; some interaction with pore helix of same subunit | at interface with S4 segment different subunit, some interaction with pore helix of same subunit | no/partial        | ILE A 274<br>TYR A 281<br>LEU A 282<br>TYR A 299<br>LEU D 137<br>SER D 140<br>VAL D 141<br>THR D 144<br>ILE D 235<br>ARG D 237 | ILE A 274<br>SER A 277<br>PHE A 279<br>LEU A 282<br>TYR A 299<br>GLY D 229<br>PHE D 232<br>LEU D 233<br>LEU D 236 | (1;26)                                                                                                                                                                                                                |         |
| Val280Glu | LQTS1 | in top of S5 at interface with P-helix and S6                                                                             | at interface with S6 and P-helix                                                                 | no/no             | TYR A 281<br>GLU A 284<br>ALA A 302<br>TRP A 305<br>PRO A 320<br>GLY A 325<br>ILE A 328                                        | SER A 276<br>PHE A 279<br>TYR A 281<br>PHE A 296<br>ALA A 302<br>TRP A 305<br>PRO A 320<br>GLY A 325<br>ILE A 328 | (3)                                                                                                                                                                                                                   |         |
| Tyr281Cys | LQTS1 | in top of S5, interacts with S6 in same subunit and with top of S1 from another subunit in open state                     | at interface with S6 and P-helix                                                                 | slightly/slightly | TYR A 278<br>VAL A 280<br>LEU A 282<br>GLU A 284<br>LYS A 285<br>PHE A 296                                                     | VAL A 280<br>LEU A 282<br>GLU A 284<br>LYS A 285<br>PHE A 296<br>GLY A 297                                        | When expressed only with E1, complete loss of function. However, trafficks normally. When co-expressed with WT, exerts DN effect to reduce current. (21)<br>Favors closed state or reduces conductance of open state. | (21;22) |

|           |                                 |                                                                                            |                                                                                                                |                   |                                                                                                      |                                                                                                                                |                                                                                                                                                                                                                                                 |         |
|-----------|---------------------------------|--------------------------------------------------------------------------------------------|----------------------------------------------------------------------------------------------------------------|-------------------|------------------------------------------------------------------------------------------------------|--------------------------------------------------------------------------------------------------------------------------------|-------------------------------------------------------------------------------------------------------------------------------------------------------------------------------------------------------------------------------------------------|---------|
|           |                                 |                                                                                            |                                                                                                                |                   | GLY A 297<br>TYR A 299<br>ALA A 302<br>THR D 144<br>GLN D 147                                        | TYR A 299<br>ALA A 302                                                                                                         |                                                                                                                                                                                                                                                 |         |
| Glu284Lys | LQTS1                           | located in S5-P connector, interacts with top ends of S5 and S6 under connector segment    | located in S5-P connector, interacts with top ends of S5 and S6 under connector segments                       | slightly/slightly | VAL A 280<br>TYR A 281<br>ALA A 283<br>PHE A 296<br>PRO A 320<br>GLN A 321<br>THR A 322<br>GLY A 325 | TYR A 281<br>ALA A 283<br>ALA A 287<br>GLY A 292<br>ARG A 293<br>PHE A 296<br>PRO A 320<br>GLN A 321<br>THR A 322<br>GLY A 325 | (7)                                                                                                                                                                                                                                             |         |
| Glu290Lys | LQTS1                           | located in 3-10 helix of S5-P connector, at interface with P-S6 connecting strand          | located in extended loop of S5-P connector, solvent exposed                                                    | partial/yes       | ALA A 287<br>ASN A 289<br>ARG A 293<br>GLU A 295<br>PHE A 296                                        | VAL A 288<br>ASN A 289<br>SER A 291                                                                                            | (1)                                                                                                                                                                                                                                             |         |
| Gly292Asp | LQTS1                           | S5-P, located at end of 3-10 helix, oriented away from channel                             | located in middle of loop connector of S5-P; in contact with filter-S6 connector                               | yes/slightly      | none                                                                                                 | GLU A 284<br>ALA A 287<br>GLN A 321                                                                                            | (1;43)                                                                                                                                                                                                                                          |         |
| Arg293Cys | LQTS1                           | S5-P, located at end of 3-10 helix, oriented toward central pore axis, but no interactions | located in towards end of S5-P connector, oriented towards central axis and interacts with filter-S6 connector | yes/yes           | ASN A 289<br>GLU A 290<br>GLU A 295                                                                  | GLU A 284<br>GLU A 295<br>PHE A 296<br>LYS A 318<br>VAL A 319<br>GLN A 321<br>ASP D 317                                        | (1;26)                                                                                                                                                                                                                                          |         |
| Ala300Thr | reported as LQTS1 but may be AF | at beginning of P-helix, oriented towards S6 of another subunit                            | interacts with top of S6 from different subunit                                                                | yes/yes           | SER A 298<br>TRP A 304                                                                               | SER A 298<br>TYR A 299<br>ASP A 301<br>LYS B 326                                                                               | When expressed only with E1, current is reduced and V <sub>1/2</sub> is shifted towards more NEGATIVE potential and activation is accelerated. Trafficks normally. When co-expressed with WT, no loss of WT current. (21)<br>Favors open state. | (21;44) |
| Ala302Val | LQTS1                           | P-helix, at interface with S5 from same subunit                                            | at interface with S5 from the same subunit                                                                     | no/no             | SER A 277<br>VAL A 280<br>TYR A 281<br>TYR A 299                                                     | SER A 277<br>VAL A 280<br>TYR A 281<br>PHE A 296<br>TYR A 299<br>LEU A 303<br>TRP A 305                                        | (1;26)                                                                                                                                                                                                                                          |         |
| Ala302Thr | LQTS1                           | P-helix, at interface with S5 from same subunit                                            | at interface with S5 from the same subunit                                                                     | no/no             | SER A 277<br>VAL A 280<br>TYR A 281                                                                  | SER A 277<br>VAL A 280<br>TYR A 281                                                                                            | (3)                                                                                                                                                                                                                                             |         |

|           |                                      |                                                                                                                          |                                                                                                       |                   |                                                                                                                                             |                                                                                                                                                                                    |                                                                                                                                                                                                                                                                                                                                                        |           |
|-----------|--------------------------------------|--------------------------------------------------------------------------------------------------------------------------|-------------------------------------------------------------------------------------------------------|-------------------|---------------------------------------------------------------------------------------------------------------------------------------------|------------------------------------------------------------------------------------------------------------------------------------------------------------------------------------|--------------------------------------------------------------------------------------------------------------------------------------------------------------------------------------------------------------------------------------------------------------------------------------------------------------------------------------------------------|-----------|
|           |                                      |                                                                                                                          |                                                                                                       |                   | TYR A 299                                                                                                                                   | PHE A 296<br>TYR A 299<br>LEU A 303<br>TRP A 305                                                                                                                                   |                                                                                                                                                                                                                                                                                                                                                        |           |
| Trp304Arg |                                      | P-helix, in direct contact with selectivity filter of the same subunit and the filter-S5 connector from another subunit  | interaction with filters from same and different subunits, interaction with S6 from different subunit | partial/partial   | ALA A 300<br>ASP A 301<br>LEU A 303<br>LYS A 318<br>TRP B 323<br>LYS B 326                                                                  | ASP A 301<br>TRP A 305<br>VAL A 308<br>TYR A 315<br>ASP A 317<br>LYS A 318<br>VAL B 319<br>PRO B 320<br>LYS B 326                                                                  | (1)                                                                                                                                                                                                                                                                                                                                                    |           |
| Trp305Ser | JLNS                                 | P-helix, interacts with filter, filter-S6 connector, and S6, all from same subunit and also filter from adjacent subunit | interacts with S6, P-helix and filter, all from same subunit and also filter from adjacent subunit    | no/no             | SER A 276<br>VAL A 280<br>GLY A 306<br>THR A 309<br>LYS A 318<br>VAL A 319<br>PRO A 320<br>ILE A 328<br>ALA A 329<br>PHE A 332<br>TYR D 315 | SER A 276<br>VAL A 280<br>PHE A 296<br>ALA A 302<br>TRP A 304<br>GLY A 306<br>THR A 309<br>LYS A 318<br>VAL A 319<br>PRO A 320<br>ILE A 328<br>ALA A 329<br>PHE A 332<br>TYR D 315 | When expressed alone or with E1: complete loss of function. When co-expressed with E1 and WT, observed channel properties match that of WT. (12) <b>Misfolds/mistrafficks.</b>                                                                                                                                                                         | (1;12;45) |
| Gly306Val | LQTS1                                | P-helix, located at interface between S5 and S6 from same subunit                                                        | at interface with S5 and S6 from same subunit                                                         | no/no             | LEU A 273<br>SER A 277<br>LEU A 303<br>TRP A 305<br>THR A 309<br>PHE A 332                                                                  | LEU A 273<br>SER A 276<br>TRP A 305<br>THR A 309<br>PHE A 332                                                                                                                      |                                                                                                                                                                                                                                                                                                                                                        | (18)      |
| Gly306Arg | LQTS1                                | P-helix, located at interface between S5 and S6 from same subunit                                                        | at interface with S5 and S6 from same subunit                                                         | no/no             | LEU A 273<br>SER A 277<br>LEU A 303<br>TRP A 305<br>THR A 309<br>PHE A 332                                                                  | LEU A 273<br>SER A 276<br>TRP A 305<br>THR A 309<br>PHE A 332                                                                                                                      | Loss of function when expressed alone. When co-expressed with WT and E1, DN effect on channel current and increase in the V <sub>1/2</sub> for channel activation. (16) <b>Favors closed state.</b>                                                                                                                                                    | (14) (16) |
| Val307Leu | Short QT syndrome (gain-of-function) | P-helix at interface with S6 from another subunit, also some contact with S5 from same subunit                           | at interface with S6 from a different subunit also some contact with S5 from same subunit             | slightly/slightly | LEU A 273<br>LEU A 303<br>VAL A 308<br>VAL A 310<br>SER B 330                                                                               | LEU A 273<br>LEU A 303<br>VAL A 308<br>THR A 311<br>LYS B 326<br>SER B 330                                                                                                         | Expression with E1 and in presence or absence of WT leads to more rapid channel activation and a shift to more negative V <sub>1/2</sub> . (46). When expressed in absence of E1 or WT, similar current to WT, slightly delayed activation, and no inactivation (unlike WT-only). (39) <b>Favors open state in a partially KCNE1-dependent manner.</b> | (46) (39) |

|           |       |                                                                                                                   |                                                                                                                   |                   |                                                                                                      |                                                                                                      |                                                                                                                                                                                                                                                                                                                                                                                                                                                                                                           |          |
|-----------|-------|-------------------------------------------------------------------------------------------------------------------|-------------------------------------------------------------------------------------------------------------------|-------------------|------------------------------------------------------------------------------------------------------|------------------------------------------------------------------------------------------------------|-----------------------------------------------------------------------------------------------------------------------------------------------------------------------------------------------------------------------------------------------------------------------------------------------------------------------------------------------------------------------------------------------------------------------------------------------------------------------------------------------------------|----------|
| Val308Asp | LQTS1 | in P-helix at interface with selectivity filter                                                                   | in P-helix at interface with selectivity filter                                                                   | no/no             | VAL A 307<br>ILE A 313<br>GLY A 314<br>TYR A 315<br>ASP A 317<br>LYS B 326<br>TYR D 315              | TRP A 304<br>VAL A 307<br>THR A 309<br>ILE A 313<br>GLY A 314<br>TYR A 315<br>TYR D 315              | (3)                                                                                                                                                                                                                                                                                                                                                                                                                                                                                                       |          |
| Thr309Arg | LQTS1 | in P-helix at interface between selectivity filter and S6, both from same subunit                                 | in P-helix at interface between selectivity filter and S6, both from same subunit                                 | no/no             | TRP A 305<br>GLY A 306<br>VAL A 310<br>PHE A 332<br>SER A 333<br>ILE D 313<br>TYR D 315              | TRP A 305<br>GLY A 306<br>VAL A 308<br>ALA A 329<br>PHE A 332<br>SER A 333<br>ILE D 313<br>TYR D 315 | (11)                                                                                                                                                                                                                                                                                                                                                                                                                                                                                                      |          |
| Thr309Ile | LQTS1 | in P-helix at interface between selectivity filter and S6, both from same subunit                                 | in P-helix at interface between selectivity filter and S6, both from same subunit                                 | no/no             | TRP A 305<br>GLY A 306<br>VAL A 310<br>PHE A 332<br>SER A 333<br>ILE D 313<br>TYR D 315              | TRP A 305<br>GLY A 306<br>VAL A 308<br>ALA A 329<br>PHE A 332<br>SER A 333<br>ILE D 313<br>TYR D 315 | (47)                                                                                                                                                                                                                                                                                                                                                                                                                                                                                                      |          |
| Val310Ile | LQTS1 | P-helix, at interface with S5 and S6 from same subunit                                                            | P-helix, at interface with S5 and S6 from same subunit                                                            | slightly/slightly | GLY A 269<br>LEU A 273<br>VAL A 307<br>THR A 309<br>THR A 311<br>PHE A 332<br>ALA A 336<br>PHE A 340 | LEU A 273<br>THR A 311<br>PHE A 332<br>ALA A 336<br>PHE A 339<br>PHE A 340                           | V310I is similar to WT in absence of KCNE1. In presence of WT KCNQ1 and KCNE1, V310I exerts a DN reduction of WT current amplitude, but little other effect. Based on data for V310A, V310G, and other mutants, it was proposed that this site participates in interactions with Leu273 and F340 that stabilize the open state relative to the closed state. V310A and V310G close more rapidly than WT. (48)<br>Favors closed state in a KCNE1-dpendent manner. Proposed to be close to Leu273 and F340. | (9) (48) |
| Thr311Ile | LQTS1 | P-helix, at interface between S6 and bottom of filter from another subunit and bottom of filter from same subunit | P-helix, at interface between S6 and bottom of filter from another subunit and bottom of filter from same subunit | partial/slightly  | VAL A 310<br>ILE A 313<br>PHE A 340<br>THR B 312<br>SER B 333<br>VAL B 334<br>ILE B 337              | VAL A 307<br>VAL A 310<br>ILE A 313<br>PHE A 340<br>THR B 312<br>SER B 333<br>VAL B 334<br>ILE B 337 | (49)                                                                                                                                                                                                                                                                                                                                                                                                                                                                                                      |          |
| Thr312Ile | LQTS1 | Filter, forms contacts with itself right at 4-fold symmetry axis                                                  | Filter, forms contacts with itself right at 4-fold symmetry axis                                                  | yes/no            | SER A 333<br>ILE A 337<br>THR B 312<br>THR C 312<br>THR D 311<br>THR D 312                           | SER A 333<br>ILE A 337<br>PHE A 340<br>THR B 312<br>THR C 312<br>THR D 311                           | (1;14;32)                                                                                                                                                                                                                                                                                                                                                                                                                                                                                                 |          |

|           |       |                                                                                                                   |                                                                                                                   |                   |                                                                                                                                             |                                                                                                                                                          |                                                                                                                                                                                                                                                                                 |                 |
|-----------|-------|-------------------------------------------------------------------------------------------------------------------|-------------------------------------------------------------------------------------------------------------------|-------------------|---------------------------------------------------------------------------------------------------------------------------------------------|----------------------------------------------------------------------------------------------------------------------------------------------------------|---------------------------------------------------------------------------------------------------------------------------------------------------------------------------------------------------------------------------------------------------------------------------------|-----------------|
|           |       |                                                                                                                   |                                                                                                                   |                   | ILE D 313                                                                                                                                   | THR D 312<br>ILE D 313                                                                                                                                   |                                                                                                                                                                                                                                                                                 |                 |
| Ile313Met | LQTS1 | Filter, forms contacts with P-helix from same subunit, same residue in other subunits, and S6 in adjacent subunit | Filter, forms contacts with P-helix from same subunit, same residue in other subunits, and S6 in adjacent subunit | no/no             | VAL A 308<br>THR A 311<br>TYR A 315<br>THR B 309<br>THR B 312<br>GLY B 314<br>SER B 333                                                     | VAL A 308<br>THR A 311<br>TYR A 315<br>THR B 309<br>THR B 312<br>GLY B 314<br>SER B 333<br>ILE B 337                                                     |                                                                                                                                                                                                                                                                                 | (13)            |
| Gly314Ser | LQTS1 | Filter, forms contacts with itself right at 4-fold symmetry axis                                                  | Filter, forms contacts with itself right at 4-fold symmetry axis                                                  | slightly/slightly | VAL A 308<br>ILE D 313<br>TYR D 315                                                                                                         | VAL A 308<br>ILE D 313<br>TYR D 315                                                                                                                      | Induces DN reduction in current when co-expressed with native levels of WT Q1 and E1. (50)<br>When expressed alone or with E1: complete loss of function. When co-expressed with E1 and WT, observed channel properties match that of WT. (12)<br><b>Misfolds/mistrafficks.</b> | (12;32;51) (50) |
| Gly314Cys | LQTS1 | Filter, forms contacts with itself right at 4-fold symmetry axis                                                  | Filter, forms contacts with itself right at 4-fold symmetry axis                                                  | slightly/slightly | VAL A 308<br>ILE D 313<br>TYR D 315                                                                                                         | VAL A 308<br>ILE D 313<br>TYR D 315                                                                                                                      |                                                                                                                                                                                                                                                                                 | (52)            |
| Gly314Arg |       | Filter, forms contacts with itself right at 4-fold symmetry axis                                                  | Filter, forms contacts with itself right at 4-fold symmetry axis                                                  | slightly/slightly | VAL A 308<br>ILE D 313<br>TYR D 315                                                                                                         | VAL A 308<br>ILE D 313<br>TYR D 315                                                                                                                      |                                                                                                                                                                                                                                                                                 | (1)             |
| Gly314Asp | LQTS1 | Filter, forms contacts with itself right at 4-fold symmetry axis                                                  | Filter, forms contacts with itself right at 4-fold symmetry axis                                                  | slightly/slightly | VAL A 308<br>ILE D 313<br>TYR D 315                                                                                                         | VAL A 308<br>ILE D 313<br>TYR D 315                                                                                                                      |                                                                                                                                                                                                                                                                                 | (1;26)          |
| Gly314Ala | LQTS1 | Filter, forms contacts with itself right at 4-fold symmetry axis                                                  | Filter, forms contacts with itself right at 4-fold symmetry axis                                                  | slightly/slightly | VAL A 308<br>ILE D 313<br>TYR D 315                                                                                                         | VAL A 308<br>ILE D 313<br>TYR D 315                                                                                                                      |                                                                                                                                                                                                                                                                                 | (23)            |
| Tyr315Ser | LQTS1 | Filter, interacts with pore helix from same subunit and S6 from adjacent subunit                                  | Filter, interacts with pore helix from same subunit and S6 from adjacent subunit and with S5-P connector          | partial/slightly  | VAL A 308<br>ILE A 313<br>ASP A 317<br>TRP B 305<br>VAL B 308<br>THR B 309<br>GLY B 314<br>GLY B 316<br>VAL B 319<br>PRO B 320<br>ALA B 329 | TRP A 304<br>VAL A 308<br>ILE A 313<br>ASP A 317<br>TRP B 305<br>VAL B 308<br>THR B 309<br>GLY B 314<br>GLY B 316<br>VAL B 319<br>PRO B 320<br>ALA B 329 | When expressed alone or with E1: complete loss of function. When co-expressed with E1 and WT, observed channel properties match that of WT. (12)<br><b>Misfolds/mistrafficks.</b>                                                                                               | (11;12)         |
| Tyr315Cys | LQTS1 | Filter, interacts with pore helix from same subunit and S6 from adjacent subunit                                  | Filter, interacts with pore helix from same subunit and S6 from adjacent subunit and with S5-P connector          | partial/slightly  | VAL A 308<br>ILE A 313<br>ASP A 317<br>TRP B 305<br>VAL B 308                                                                               | TRP A 304<br>VAL A 308<br>ILE A 313<br>ASP A 317<br>TRP B 305                                                                                            | When expressed alone with E1, little or no channel function detected. When co-expressed with both WT Q1 and E1, it exerts a DN affect on the WT current and also shifts V <sub>1/2</sub> to more positive potentials, suggesting                                                | (1;10) (21;53)  |

|           |       |                                                                                                                                                         |                                                                                                                                                          |                  |                                                                                                                   |                                                                                                                   |                                                                                                                                                                                                                                                               |
|-----------|-------|---------------------------------------------------------------------------------------------------------------------------------------------------------|----------------------------------------------------------------------------------------------------------------------------------------------------------|------------------|-------------------------------------------------------------------------------------------------------------------|-------------------------------------------------------------------------------------------------------------------|---------------------------------------------------------------------------------------------------------------------------------------------------------------------------------------------------------------------------------------------------------------|
|           |       |                                                                                                                                                         |                                                                                                                                                          |                  | THR B 309<br>GLY B 314<br>GLY B 316<br>VAL B 319<br>PRO B 320<br>ALA B 329                                        | VAL B 308<br>THR B 309<br>GLY B 314<br>GLY B 316<br>VAL B 319<br>PRO B 320<br>ALA B 329                           | stabilization of the closed state relative to the open state.(53);<br>When expressed only with E1, complete loss of function. However, trafficks normally. When co-expressed with WT, exerts DN effect to reduce current. (21)<br><b>Favors closed state.</b> |
| Gly316Arg | LQTS1 | Filter, forms contacts with itself right at 4-fold symmetry axis                                                                                        | Filter, forms contacts with itself right at 4-fold symmetry axis                                                                                         | partial/partial  | VAL A 319<br>TYR D 315                                                                                            | VAL A 319<br>TYR D 315                                                                                            | (1;54)                                                                                                                                                                                                                                                        |
| Gly316Glu |       | Filter, forms contacts with itself right at 4-fold symmetry axis                                                                                        | Filter, forms contacts with itself right at 4-fold symmetry axis                                                                                         | partial/partial  | VAL A 319<br>TYR D 315                                                                                            | VAL A 319<br>TYR D 315                                                                                            | (3)                                                                                                                                                                                                                                                           |
| Asp317Gly | LQTS1 | top of filter, interacting with filter-S6 connector from another subunit, and P-helix from same subunit                                                 | top of filter, interacting with filter-S6 connector from another subunit, and P-helix from same subunit, and the S4-P connector from a different subunit | partial/partial  | VAL A 308<br>TYR A 315<br>LYS A 318<br>VAL B 319<br>GLN B 321<br>LYS B 326                                        | TRP A 304<br>TYR A 315<br>LYS A 318<br>VAL B 319<br>GLN B 321                                                     | (55)                                                                                                                                                                                                                                                          |
| Asp317Asn | LQTS1 | top of filter, interacting with filter-S6 connector from another subunit, and P-helix from same subunit                                                 | top of filter, interacting with filter-S6 connector from another subunit, and P-helix from same subunit, and the S4-P connector from a different subunit | slightly/partial | VAL A 308<br>TYR A 315<br>LYS A 318<br>VAL B 319<br>GLN B 321<br>LYS B 326                                        | TRP A 304<br>TYR A 315<br>LYS A 318<br>VAL B 319<br>GLN B 321                                                     | (32;56)                                                                                                                                                                                                                                                       |
| Lys318Asn | LQTS1 | located in filter-S6 connector, interacts with P-helix and S5-P connector, both from same subunit                                                       | located in filter-S6 connector, interacts with P-helix and S5-P connector, both from same subunit                                                        | partial/slightly | VAL A 294<br>PHE A 296<br>ASP A 301<br>TRP A 304<br>TRP A 305<br>ASP A 317                                        | ARG A 293<br>GLU A 295<br>PHE A 296<br>SER A 298<br>ASP A 301<br>TRP A 304<br>TRP A 305<br>ASP A 317              | (10)                                                                                                                                                                                                                                                          |
| Pro320Ala | LQTS1 | located in filter-S5 connector, interacts with P helix from both same and adjacent subunit and S6 from same subunit, also interacts with S5-P connector | located in filter-S5 connector, interacts with P helix from both same and adjacent subunit and S6 from same subunit, also interacts with S5-P connector  | no/no            | VAL A 280<br>GLU A 284<br>TRP A 305<br>VAL A 319<br>GLY A 325<br>LYS A 326<br>ALA A 329<br>TRP D 304<br>TYR D 315 | VAL A 280<br>GLU A 284<br>PHE A 296<br>TRP A 305<br>VAL A 319<br>GLY A 325<br>ALA A 329<br>TRP D 304<br>TYR D 315 | (11)                                                                                                                                                                                                                                                          |
| Thr322Ala | LQTS1 | at beginning of S6, interacts with top of S5 and S5-P connector from same                                                                               | at beginning of S6, interacting with S5-P-helix connector from the same subunit                                                                          | yes/partial      | ALA A 283<br>GLU A 284<br>GLN A 321<br>VAL A 324                                                                  | ALA A 283<br>GLU A 284<br>ALA A 287<br>GLN A 321                                                                  | (1;2)                                                                                                                                                                                                                                                         |

|           |       |                                                                            |                                                                                 |                   |                                                                                                                   |                                                                                                      |                                                                                                                                                                                                                                                                                                                                       |                |
|-----------|-------|----------------------------------------------------------------------------|---------------------------------------------------------------------------------|-------------------|-------------------------------------------------------------------------------------------------------------------|------------------------------------------------------------------------------------------------------|---------------------------------------------------------------------------------------------------------------------------------------------------------------------------------------------------------------------------------------------------------------------------------------------------------------------------------------|----------------|
|           |       | subunit                                                                    |                                                                                 |                   | GLY A 325                                                                                                         | TRP A 323<br>VAL A 324<br>GLY A 325                                                                  |                                                                                                                                                                                                                                                                                                                                       |                |
| Thr322Met | LQTS  | S6, located at interface with S5 of same subunit                           | at beginning of S6, interacting with S5-P-helix connector from the same subunit | yes/partial       | ALA A 283<br>GLU A 284<br>GLN A 321<br>VAL A 324<br>GLY A 325                                                     | ALA A 283<br>GLU A 284<br>ALA A 287<br>GLN A 321<br>TRP A 323<br>VAL A 324<br>GLY A 325              | (3)                                                                                                                                                                                                                                                                                                                                   |                |
| Gly325Arg | LQTS1 | S6, located at interface with S5 of same subunit                           | at interface with S5 from the same subunit                                      | no/no             | VAL A 280<br>ALA A 283<br>GLU A 284<br>PRO A 320<br>THR A 322<br>VAL A 324<br>ILE A 328                           | VAL A 280<br>ALA A 283<br>GLU A 284<br>PRO A 320<br>THR A 322<br>VAL A 324<br>ILE A 328              | (13)                                                                                                                                                                                                                                                                                                                                  |                |
| Ala341Glu | LQTS1 | S6 (inside vestibule), located near the same position in adjacent subunits | at interface with other S6 subunits                                             | yes/no            | ILE A 337<br>LEU A 342<br>ALA D 344                                                                               | ILE A 337<br>PRO D 343<br>ALA D 344<br>LEU D 347                                                     | Loss of function when expressed alone. When co-expressed with WT, DN effect on channel current. When co-expressed with WT and E1, DN effect on channel current and increase in the V <sub>1/2</sub> for channel activation. (16)<br>Favors closed state.                                                                              | (14) (16)      |
| Ala341Val | LQTS1 | S6 (inside vestibule), located near the same position in adjacent subunits | at interface with other S6 subunits                                             | yes/no            | ILE A 337<br>LEU A 342<br>ALA D 344                                                                               | ILE A 337<br>PRO D 343<br>ALA D 344<br>LEU D 347                                                     | Loss of function, but no DN effect on WT in presence or absence of E1. Almost certainly misfolds/mistrafficks. (16); Induces DN reduction in current when co-expressed with native levels of WT Q1 and E1. (50)<br>Conflicting results.                                                                                               | (1;14;16) (50) |
| Leu342Phe | LQTS1 | S6, located at interface with S6 from adjacent subunit                     | at interface with S5 from same subunit and S6 from a different subunit          | slightly/slightly | ILE A 268<br>PHE A 339<br>ALA A 341<br>PRO A 343<br>LEU D 251<br>VAL D 254<br>LEU D 347<br>GLY D 348<br>PHE D 351 | GLU A 261<br>LEU A 262<br>THR A 265<br>PHE A 339<br>PRO A 343<br>ILE A 346<br>LEU D 347<br>PHE D 351 | When expressed alone or with E1: complete loss of function. When co-expressed with E1 and WT, observed channel properties match that of WT. (12)<br>Misfolds/mistrafficks.                                                                                                                                                            | (11;12)        |
| Pro343Ser | LQTS1 | S6, at interface with S5 from same subunit                                 | interacts with the same side chain at central 4-fold axis                       | no/partial        | GLU A 261<br>THR A 264<br>THR A 265<br>ILE A 268<br>PHE A 340<br>LEU A 342<br>LEU A 347                           | PHE A 340<br>LEU A 342<br>ALA B 341                                                                  | When expressed alone, shows reduced current, activates slowly and exhibits no tail current. When expressed with E1 only, exhibits complete loss of function. When expressed with WT Q1 only or with both E1 and Q1, exhibits DN effect on current and no tail current.(57)<br>Favors closed state or lower conductance of open state. | (1;57)         |



|           |       |                                                         |                                                           |            |                                                                                         |                                                                            |                                                                                                                                                                                                                                                                                                                                                                                                                       |             |
|-----------|-------|---------------------------------------------------------|-----------------------------------------------------------|------------|-----------------------------------------------------------------------------------------|----------------------------------------------------------------------------|-----------------------------------------------------------------------------------------------------------------------------------------------------------------------------------------------------------------------------------------------------------------------------------------------------------------------------------------------------------------------------------------------------------------------|-------------|
| Pro343Arg | LQTS1 | S6, IBID                                                | interacts with the same side chain at central 4-fold axis | no/partial | GLU A 261<br>THR A 264<br>THR A 265<br>ILE A 268<br>PHE A 340<br>LEU A 342<br>LEU A 347 | PHE A 340<br>LEU A 342<br>ALA B 341                                        |                                                                                                                                                                                                                                                                                                                                                                                                                       | (3)         |
| Pro343Leu | LQTS1 | S6, IBID                                                | at interface with S6 from different subunit               | no/partial | GLU A 261<br>THR A 264<br>THR A 265<br>ILE A 268<br>PHE A 340<br>LEU A 342<br>LEU A 347 | PHE A 340<br>LEU A 342<br>ALA B 341                                        |                                                                                                                                                                                                                                                                                                                                                                                                                       | (3)         |
| Ala344Glu | LQTS1 | S6 (inside vestibule)                                   | interacts with the same side chain at central 4-fold axis | partial/no | ILE B 337<br>ALA B 341                                                                  | ALA B 341<br>ALA B 344<br>ALA C 344<br>ALA D 344                           |                                                                                                                                                                                                                                                                                                                                                                                                                       | (1;23)      |
| Ala344Val | LQTS1 | S6, at interface with S6 from other subunit             | interacts with the same side chain at central 4-fold axis | partial/no | ILE B 337<br>ALA B 341                                                                  | ALA B 341<br>ALA B 344<br>ALA C 344<br>ALA D 344                           | Trafficks normally and has near-normal max current. In absence of E1, induces voltage-induced inactivation and shifts voltage dependence of activation to more positive potentials. With E1 only, exhibits near-WT current, but increased V <sub>1/2</sub> . Co-expression with WT and E1 leads to properties intermediate between WT/E1 and this mutant/E1. (58)<br>Favors closed state in KCNE1-independent manner. | (1;11) (58) |
| Gly345Glu | LQTS1 | S6, at interface with S6 from other subunits            | interacting with other S6 segments                        | yes/no     | GLY A 348<br>SER A 349                                                                  | GLY A 348<br>LEU D 347<br>GLY D 348<br>PHE D 351                           | Loss of function when expressed alone. When co-expressed with WT, DN effect on channel current. When co-expressed with WT and E1, DN effect on channel current and increase in the V <sub>1/2</sub> for channel activation. (16)<br>Favors closed state in KCNE1-independent manner.                                                                                                                                  | (1;14;16)   |
| Gly345Arg | LQTS1 | S6, at interface with S6 from other subunits            | interacting with other S6 segments                        | yes/no     | GLY A 348<br>SER A 349                                                                  | GLY A 348<br>LEU D 347<br>GLY D 348<br>PHE D 351                           |                                                                                                                                                                                                                                                                                                                                                                                                                       | (59)        |
| Ser349Trp | LQTS1 | S6, oriented towards center of pore, exposed to solvent | interacting with other S6 segments                        | yes/no     | GLY A 345<br>ILE A 346                                                                  | ARG A 259<br>ILE A 346<br>GLY D 348<br>PHE D 351<br>ALA D 352<br>VAL D 355 |                                                                                                                                                                                                                                                                                                                                                                                                                       | (1;9)       |

|           |       |                                                                                                    |                                                                           |                   |                                                                                                                                             |                                                                                                                                                          |                                                                                                                                                                                                                                                                                                                                                                                                                     |
|-----------|-------|----------------------------------------------------------------------------------------------------|---------------------------------------------------------------------------|-------------------|---------------------------------------------------------------------------------------------------------------------------------------------|----------------------------------------------------------------------------------------------------------------------------------------------------------|---------------------------------------------------------------------------------------------------------------------------------------------------------------------------------------------------------------------------------------------------------------------------------------------------------------------------------------------------------------------------------------------------------------------|
| Ser349Pro | LQTS1 | S6, oriented towards center of pore, exposed to solvent                                            | interacting with other S6 segments                                        | yes/no            | GLY A 345<br>ILE A 346                                                                                                                      | ARG A 259<br>ILE A 346<br>GLY D 348<br>PHE D 351<br>ALA D 352<br>VAL D 355                                                                               | (3)                                                                                                                                                                                                                                                                                                                                                                                                                 |
| Gly350Arg | LQTS1 | S6 oriented towards center of pore, exposed to solvent                                             | at interface with S4-S5 linker from same subunit                          | partial/partial   | VAL A 254<br>HIS A 258<br>LEU A 353<br>LYS A 354                                                                                            | PHE A 351<br>LEU A 353                                                                                                                                   | (3)                                                                                                                                                                                                                                                                                                                                                                                                                 |
| Phe351Ser | LQTS1 | S6, at interface with S4-S5 linker of same subunit and with S5 and S6, both of a different subunit | located at interface between S5 and S6 of a different subunit             | slightly/slightly | THR A 247<br>LEU A 250<br>LEU A 251<br>VAL A 254<br>GLY A 348<br>VAL A 355<br>GLU B 261<br>THR B 264<br>ILE B 268<br>LEU B 342<br>PRO B 343 | THR A 247<br>LEU A 347<br>GLY A 348<br>GLY A 350<br>LYS A 354<br>VAL A 355<br>ARG B 259<br>GLU B 261<br>LEU B 342<br>GLY B 345<br>ILE B 346<br>SER B 349 | (3)                                                                                                                                                                                                                                                                                                                                                                                                                 |
| Leu353Pro | LQTS1 | S6, aligned towards solvent                                                                        | interacts with both other S6 segments and S4-S5 linker on same subunit    | yes/slightly      | GLY A 350<br>ALA A 352<br>LYS A 354<br>GLN A 356<br>GLN A 357                                                                               | VAL A 254<br>HIS A 258<br>GLY A 350<br>LYS A 354<br>GLN A 356<br>GLN A 357<br>VAL D 355<br>GLN D 359                                                     | (1;10)                                                                                                                                                                                                                                                                                                                                                                                                              |
| Gln357Arg | LQTS1 | S6, exposed to solvent, oriented towards S4-S5 linker of the same subunit                          | S6, exposed to solvent, oriented towards S4-S5 linker of the same subunit | yes/yes           | LEU A 353<br>LYS A 354<br>GLN A 356                                                                                                         | LEU A 353<br>LYS A 354<br>GLN A 356<br>LYS A 358                                                                                                         | Q357R alone shows slightly reduced current, $V_{1/2}$ shifted in more positive direction and delayed activation. In presence of E1, similar trends, but also faster tail current decay (faster deactivation). In presence of both E1 and WT, properties are intermediate between WT/E1-only and mutant/E1-only. Q357R is more mistrafficking prone than WT. (60)<br>Favors closed state. Modest trafficking defect. |

## References

1. Tester, D. J., Will, M. L., Haglund, C. M., and Ackerman, M. J. (2005) Compendium of cardiac channel mutations in 541 consecutive unrelated patients referred for long QT syndrome genetic testing, *Heart Rhythm*. 2, 507-517.
2. Nemec, J., Ackerman, M. J., Tester, D. J., Hejlik, J., and Shen, W. K. (2003) Catecholamine-provoked microvoltage T wave alternans in genotyped long QT syndrome, *Pacing Clin. Electrophysiol.* 26, 1660-1667.
3. Napolitano, C., Priori, S. G., Schwartz, P. J., Bloise, R., Ronchetti, E., Nastoli, J., Bottelli, G., Cerrone, M., and Leonardi, S. (2005) Genetic testing in the long QT syndrome: development and validation of an efficient approach to genotyping in clinical practice, *JAMA* 294, 2975-2980.
4. Chen, Y. H., Xu, S. J., Bendahhou, S., Wang, X. L., Wang, Y., Xu, W. Y., Jin, H. W., Sun, H., Su, X. Y., Zhuang, Q. N., Yang, Y. Q., Li, Y. B., Liu, Y., Xu, H. J., Li, X. F., Ma, N., Mou, C. P., Chen, Z., Barhanin, J., and Huang, W. (2003) KCNQ1 gain-of-function mutation in familial atrial fibrillation, *Science* 299, 251-254.
5. Hong, K., Piper, D. R., az-Valdecantos, A., Brugada, J., Oliva, A., Burashnikov, E., Santos-de-Soto, J., Grueso-Montero, J., az-Enfante, E., Brugada, P., Sachse, F., Sanguinetti, M. C., and Brugada, R. (2005) De novo KCNQ1 mutation responsible for atrial fibrillation and short QT syndrome in utero, *Cardiovasc. Res.* 68, 433-440.
6. Hong, K., Piper, D. R., az-Valdecantos, A., Brugada, J., Oliva, A., Burashnikov, E., Santos-de-Soto, J., Grueso-Montero, J., az-Enfante, E., Brugada, P., Sachse, F., Sanguinetti, M. C., and Brugada, R. (2005) De novo KCNQ1 mutation responsible for atrial fibrillation and short QT syndrome in utero, *Cardiovasc. Res.* 68, 433-440.
7. Zareba, W., Moss, A. J., Sheu, G., Kaufman, E. S., Priori, S., Vincent, G. M., Towbin, J. A., Benhorin, J., Schwartz, P. J., Napolitano, C., Hall, W. J., Keating, M. T., Qi, M., Robinson, J. L., and Andrews, M. L. (2003) Location of mutation in the KCNQ1 and phenotypic presentation of long QT syndrome, *J. Cardiovasc. Electrophysiol.* 14, 1149-1153.
8. Larsen, L. A., Christiansen, M., Vuust, J., and Andersen, P. S. (1999) High-throughput single-strand conformation polymorphism analysis by automated capillary electrophoresis: robust multiplex analysis and pattern-based identification of allelic variants, *Hum. Mutat.* 13, 318-327.
9. Splawski, I., Shen, J., Timothy, K. W., Lehmann, M. H., Priori, S., Robinson, J. L., Moss, A. J., Schwartz, P. J., Towbin, J. A., Vincent, G. M., and Keating, M. T. (2000) Spectrum of mutations in long-QT syndrome genes. KVLQT1, HERG, SCN5A, KCNE1, and KCNE2, *Circulation* 102, 1178-1185.
10. Splawski, I., Shen, J., Timothy, K. W., Vincent, G. M., Lehmann, M. H., and Keating, M. T. (1998) Genomic structure of three long QT syndrome genes: KVLQT1, HERG, and KCNE1, *Genomics* 51, 86-97.
11. Donger, C., Denjoy, I., Berthet, M., Neyroud, N., Cruaud, C., Bennaceur, M., Chivoret, G., Schwartz, K., Coumel, P., and Guicheney, P. (1997) KVLQT1 C-terminal missense mutation causes a forme fruste long-QT syndrome, *Circulation* 96, 2778-2781.

12. Chouabe, C., Neyroud, N., Guicheney, P., Lazdunski, M., Romey, G., and Barhanin, J. (1997) Properties of KvLQT1 K<sup>+</sup> channel mutations in Romano-Ward and Jervell and Lange-Nielsen inherited cardiac arrhythmias, *EMBO J.* **16**, 5472-5479.
13. Tanaka, T., Nagai, R., Tomoike, H., Takata, S., Yano, K., Yabuta, K., Haneda, N., Nakano, O., Shibata, A., Sawayama, T., Kasai, H., Yazaki, Y., and Nakamura, Y. (1997) Four novel KVLQT1 and four novel HERG mutations in familial long-QT syndrome, *Circulation* **95**, 565-567.
14. Wang, Q., Curran, M. E., Splawski, I., Burn, T. C., Millholland, J. M., VanRaay, T. J., Shen, J., Timothy, K. W., Vincent, G. M., de, J. T., Schwartz, P. J., Toubin, J. A., Moss, A. J., Atkinson, D. L., Landes, G. M., Connors, T. D., and Keating, M. T. (1996) Positional cloning of a novel potassium channel gene: KVLQT1 mutations cause cardiac arrhythmias, *Nat. Genet.* **12**, 17-23.
15. Jongbloed, R. J., Wilde, A. A., Geelen, J. L., Doevendans, P., Schaap, C., Van, L., I, van Tintelen, J. P., Cobben, J. M., Beaufort-Krol, G. C., Geraedts, J. P., and Smeets, H. J. (1999) Novel KCNQ1 and HERG missense mutations in Dutch long-QT families, *Hum. Mutat.* **13**, 301-310.
16. Wang, Z., Tristani-Firouzi, M., Xu, Q., Lin, M., Keating, M. T., and Sanguinetti, M. C. (1999) Functional effects of mutations in KvLQT1 that cause long QT syndrome, *J. Cardiovasc. Electrophysiol.* **10**, 817-826.
17. Chouabe, C., Neyroud, N., Richard, P., Denjoy, I., Hainque, B., Romey, G., Drici, M. D., Guicheney, P., and Barhanin, J. (2000) Novel mutations in KvLQT1 that affect I<sub>Ks</sub> activation through interactions with Isk, *Cardiovasc. Res.* **45**, 971-980.
18. Liu, W., Yang, J., Hu, D., Kang, C., Li, C., Zhang, S., Li, P., Chen, Z., Qin, X., Ying, K., Li, Y., Li, Y., Li, Z., Cheng, X., Li, L., Qi, Y., Chen, S., and Wang, Q. (2002) KCNQ1 and KCNH2 mutations associated with long QT syndrome in a Chinese population, *Hum. Mutat.* **20**, 475-476.
19. Yamaguchi, M., Shimizu, M., Ino, H., Terai, H., Hayashi, K., Mabuchi, H., Hoshi, N., and Higashida, H. (2003) Clinical and electrophysiological characterization of a novel mutation (F193L) in the KCNQ1 gene associated with long QT syndrome, *Clin. Sci. (Lond)* **104**, 377-382.
20. Liu, W., Yang, J., Hu, D., Kang, C., Li, C., Zhang, S., Li, P., Chen, Z., Qin, X., Ying, K., Li, Y., Li, Y., Li, Z., Cheng, X., Li, L., Qi, Y., Chen, S., and Wang, Q. (2002) KCNQ1 and KCNH2 mutations associated with long QT syndrome in a Chinese population, *Hum. Mutat.* **20**, 475-476.
21. Bianchi, L., Priori, S. G., Napolitano, C., Surewicz, K. A., Dennis, A. T., Memmi, M., Schwartz, P. J., and Brown, A. M. (2000) Mechanisms of I(Ks) suppression in LQT1 mutants, *Am. J. Physiol Heart Circ. Physiol* **279**, H3003-H3011.
22. Priori, S. G., Barhanin, J., Hauer, R. N., Haverkamp, W., Jongsma, H. J., Kleber, A. G., McKenna, W. J., Roden, D. M., Rudy, Y., Schwartz, K., Schwartz, P. J., Towbin, J. A., and Wilde, A. M. (1999) Genetic and molecular basis of cardiac arrhythmias: impact on clinical management parts I and II, *Circulation* **99**, 518-528.
23. Shimizu, W., Horie, M., Ohno, S., Takenaka, K., Yamaguchi, M., Shimizu, M., Washizuka, T., Aizawa, Y., Nakamura, K., Ohe, T., Aiba, T., Miyamoto, Y., Yoshimasa, Y., Towbin, J. A., Priori, S. G., and Kamakura, S. (2004) Mutation site-specific differences in arrhythmic risk and sensitivity to sympathetic stimulation in the LQT1 form

of congenital long QT syndrome: multicenter study in Japan, *J. Am. Coll. Cardiol.* 44, 117-125.

24. Emeriaud, G., Douchin, S., Jouk, P. S., Andrini, P., Wroblewski, I., Marey, C., and Rossignol, A. M. (2002) [Congenital long QT syndrome in newborns], *Arch. Pediatr.* 9, 805-809.
25. Panaghie, G. and Abbott, G. W. (2007) The role of S4 charges in voltage-dependent and voltage-independent KCNQ1 potassium channel complexes, *J. Gen. Physiol* 129, 121-133.
26. Choi, G., Kopplin, L. J., Tester, D. J., Will, M. L., Haglund, C. M., and Ackerman, M. J. (2004) Spectrum and frequency of cardiac channel defects in swimming-triggered arrhythmia syndromes, *Circulation* 110, 2119-2124.
27. Itoh, T., Tanaka, T., Nagai, R., Kikuchi, K., Ogawa, S., Okada, S., Yamagata, S., Yano, K., Yazaki, Y., and Nakamura, Y. (1998) Genomic organization and mutational analysis of KVLQT1, a gene responsible for familial long QT syndrome, *Hum. Genet.* 103, 290-294.
28. Franqueza, L., Lin, M., Shen, J., Splawski, I., Keating, M. T., and Sanguinetti, M. C. (1999) Long QT syndrome-associated mutations in the S4-S5 linker of KvLQT1 potassium channels modify gating and interaction with minK subunits, *J. Biol. Chem.* 274, 21063-21070.
29. Huang, L., Bitner-Glindzicz, M., Tranebjaerg, L., and Tinker, A. (2001) A spectrum of functional effects for disease causing mutations in the Jervell and Lange-Nielsen syndrome, *Cardiovasc. Res.* 51, 670-680.
30. Wilson, A. J., Quinn, K. V., Graves, F. M., Bitner-Glindzicz, M., and Tinker, A. (2005) Abnormal KCNQ1 trafficking influences disease pathogenesis in hereditary long QT syndromes (LQT1), *Cardiovasc. Res.* 67, 476-486.
31. Park, K. H., Piron, J., Dahimene, S., Merot, J., Baro, I., Escande, D., and Loussouarn, G. (2005) Impaired KCNQ1-KCNE1 and phosphatidylinositol-4,5-bisphosphate interaction underlies the long QT syndrome, *Circ. Res.* 96, 730-739.
32. Mohammad-Panah, R., Demolombe, S., Neyroud, N., Guicheney, P., Kyndt, F., van den, H. M., Baro, I., and Escande, D. (1999) Mutations in a dominant-negative isoform correlate with phenotype in inherited cardiac arrhythmias, *Am. J. Hum. Genet.* 64, 1015-1023.
33. Deschenes, D., Acharfi, S., Pouliot, V., Hegele, R., Krahn, A., Daleau, P., and Chahine, M. (2003) Biophysical characteristics of a new mutation on the KCNQ1 potassium channel (L251P) causing long QT syndrome, *Can. J. Physiol Pharmacol.* 81, 129-134.
34. Krahn, A. D., Wang, J., Spindler, B., Skanes, A. C., Yee, R., Klein, G. J., and Hegele, R. A. (2000) A novel mutation in KVLQT1, L122P, found in a family with autosomal dominant long QT syndrome, *Am. Heart J.* 140, 146-149.
35. Kubota, T., Shimizu, W., Kamakura, S., and Horie, M. (2000) Hypokalemia-induced long QT syndrome with an underlying novel missense mutation in S4-S5 linker of KCNQ1, *J. Cardiovasc. Electrophysiol.* 11, 1048-1054.
36. Tranebjaerg, L., Bathen, J., Tyson, J., and Bitner-Glindzicz, M. (1999) Jervell and Lange-Nielsen syndrome: a Norwegian perspective, *Am. J. Med. Genet.* 89, 137-146.

37. Murray, A., Potet, F., Bellocq, C., Baro, I., Reardon, W., Hughes, H. E., and Jeffery, S. (2002) Mutation in KCNQ1 that has both recessive and dominant characteristics, *J. Med. Genet.* 39, 681-685.
38. Tyson, J., Tranebjaerg, L., McEntagart, M., Larsen, L. A., Christiansen, M., Whiteford, M. L., Bathen, J., Aslaksen, B., Sorland, S. J., Lund, O., Pembrey, M. E., Malcolm, S., and Bitner-Glindzicz, M. (2000) Mutational spectrum in the cardioauditory syndrome of Jervell and Lange-Nielsen, *Hum. Genet.* 107, 499-503.
39. Seeböhm, G., Scherer, C. R., Busch, A. E., and Lerche, C. (2001) Identification of specific pore residues mediating KCNQ1 inactivation. A novel mechanism for long QT syndrome, *J. Biol. Chem.* 276, 13600-13605.
40. Wilson, A. J., Quinn, K. V., Graves, F. M., Bitner-Glindzicz, M., and Tinker, A. (2005) Abnormal KCNQ1 trafficking influences disease pathogenesis in hereditary long QT syndromes (LQT1), *Cardiovasc. Res.* 67, 476-486.
41. Arnestad, M., Crotti, L., Rognum, T. O., Insolia, R., Pedrazzini, M., Ferrandi, C., Vege, A., Wang, D. W., Rhodes, T. E., George, A. L., Jr., and Schwartz, P. J. (2007) Prevalence of long-QT syndrome gene variants in sudden infant death syndrome, *Circulation* 115, 361-367.
42. Liu, W., Yang, J., Hu, D., Kang, C., Li, C., Zhang, S., Li, P., Chen, Z., Qin, X., Ying, K., Li, Y., Li, Y., Li, Z., Cheng, X., Li, L., Qi, Y., Chen, S., and Wang, Q. (2002) KCNQ1 and KCNH2 mutations associated with long QT syndrome in a Chinese population, *Hum. Mutat.* 20, 475-476.
43. Van, L., I, Birnie, E., Alders, M., Jongbloed, R. J., Le, M. H., and Wilde, A. A. (2003) The use of genotype-phenotype correlations in mutation analysis for the long QT syndrome, *J. Med. Genet.* 40, 141-145.
44. Priori, S. G., Schwartz, P. J., Napolitano, C., Bianchi, L., Dennis, A., De, F. M., Brown, A. M., and Casari, G. (1998) A recessive variant of the Romano-Ward long-QT syndrome?, *Circulation* 97, 2420-2425.
45. Neyroud, N., Denjoy, I., Donger, C., Gary, F., Villain, E., Leenhardt, A., Benali, K., Schwartz, K., Coumel, P., and Guicheney, P. (1998) Heterozygous mutation in the pore of potassium channel gene KvLQT1 causes an apparently normal phenotype in long QT syndrome, *Eur. J. Hum. Genet.* 6, 129-133.
46. Bellocq, C., van Ginneken, A. C., Bezzina, C. R., Alders, M., Escande, D., Mannens, M. M., Baro, I., and Wilde, A. A. (2004) Mutation in the KCNQ1 gene leading to the short QT-interval syndrome, *Circulation* 109, 2394-2397.
47. Ko, Y. L., Tai, D. Y., Chen, S. A., Lee-Chen, G. J., Chu, C. H., and Lin, M. W. (2001) Linkage and mutation analysis in two Taiwanese families with long QT syndrome, *J. Formos. Med. Assoc.* 100, 767-771.
48. Seeböhm, G., Westenskow, P., Lang, F., and Sanguinetti, M. C. (2005) Mutation of colocalized residues of the pore helix and transmembrane segments S5 and S6 disrupt deactivation and modify inactivation of KCNQ1 K<sup>+</sup> channels, *J. Physiol* 563, 359-368.
49. Saarinen, K., Swan, H., Kainulainen, K., Toivonen, L., Viitasalo, M., and Kontula, K. (1998) Molecular genetics of the long QT syndrome: two novel mutations of the KVLQT1 gene and phenotypic expression of the mutant gene in a large kindred, *Hum. Mutat.* 11, 158-165.

50. Brink, P. A., Crotti, L., Corfield, V., Goosen, A., Durrheim, G., Hedley, P., Heradien, M., Geldenhuys, G., Vanoli, E., Bacchini, S., Spazzolini, C., Lundquist, A. L., Roden, D. M., George, A. L., Jr., and Schwartz, P. J. (2005) Phenotypic variability and unusual clinical severity of congenital long-QT syndrome in a founder population, *Circulation* 112, 2602-2610.
51. Russell, M. W., Dick, M., Collins, F. S., and Brody, L. C. (1996) KVLQT1 mutations in three families with familial or sporadic long QT syndrome, *Hum. Mol. Genet.* 5, 1319-1324.
52. Chen, S., Zhang, L., Bryant, R. M., Vincent, G. M., Flippin, M., Lee, J. C., Brown, E., Zimmerman, F., Rozich, R., Szafranski, P., Oberti, C., Sterba, R., Marangi, D., Tchou, P. J., Chung, M. K., and Wang, Q. (2003) KCNQ1 mutations in patients with a family history of lethal cardiac arrhythmias and sudden death, *Clin. Genet.* 63, 273-282.
53. Napolitano, C., Schwartz, P. J., Brown, A. M., Ronchetti, E., Bianchi, L., Pinnavaia, A., Acquaro, G., and Priori, S. G. (2000) Evidence for a cardiac ion channel mutation underlying drug-induced QT prolongation and life-threatening arrhythmias, *J. Cardiovasc. Electrophysiol.* 11, 691-696.
54. Jongbloed, R., Marcelis, C., Velter, C., Doevendans, P., Geraedts, J., and Smeets, H. (2002) DHPLC analysis of potassium ion channel genes in congenital long QT syndrome, *Hum. Mutat.* 20, 382-391.
55. Zareba, W., Moss, A. J., Sheu, G., Kaufman, E. S., Priori, S., Vincent, G. M., Towbin, J. A., Benhorin, J., Schwartz, P. J., Napolitano, C., Hall, W. J., Keating, M. T., Qi, M., Robinson, J. L., and Andrews, M. L. (2003) Location of mutation in the KCNQ1 and phenotypic presentation of long QT syndrome, *J. Cardiovasc. Electrophysiol.* 14, 1149-1153.
56. Wollnik, B., Schroeder, B. C., Kubisch, C., Esperer, H. D., Wieacker, P., and Jentsch, T. J. (1997) Pathophysiological mechanisms of dominant and recessive KVLQT1 K<sup>+</sup> channel mutations found in inherited cardiac arrhythmias, *Hum. Mol. Genet.* 6, 1943-1949.
57. Zehelein, J., Thomas, D., Khalil, M., Wimmer, A. B., Koenen, M., Licka, M., Wu, K., Kiehn, J., Brockmeier, K., Kreye, V. A., Karle, C. A., Katus, H. A., Ulmer, H. E., and Schoels, W. (2004) Identification and characterisation of a novel KCNQ1 mutation in a family with Romano-Ward syndrome, *Biochim. Biophys. Acta* 1690, 185-192.
58. Siebrands, C. C., Binder, S., Eckhoff, U., Schmitt, N., and Friederich, P. (2006) Long QT 1 mutation KCNQ1A344V increases local anesthetic sensitivity of the slowly activating delayed rectifier potassium current, *Anesthesiology* 105, 511-520.
59. van den Berg, M. H., Wilde, A. A., Robles de Medina, E. O., Meyer, H., Geelen, J. L., Jongbloed, R. J., Wellens, H. J., and Geraedts, J. P. (1997) The long QT syndrome: a novel missense mutation in the S6 region of the KVLQT1 gene, *Hum. Genet.* 100, 356-361.
60. Boulet, I. R., Raes, A. L., Ottschytsch, N., and Snyders, D. J. (2006) Functional effects of a KCNQ1 mutation associated with the long QT syndrome, *Cardiovasc. Res.* 70, 466-474.
